# Supplementary material
Source: PubMed Central journal article supplement (PMC3177695)
Supplement: supp_jlb.1210651_3TA1210-651_Sibilano_suppl_figs.pdf [file supp_jlb.1210651_3TA1210-651_Sibilano_suppl_figs.pdf]

Figure S1

A

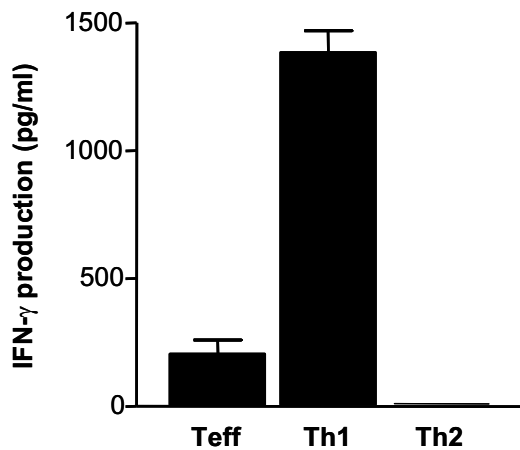

B

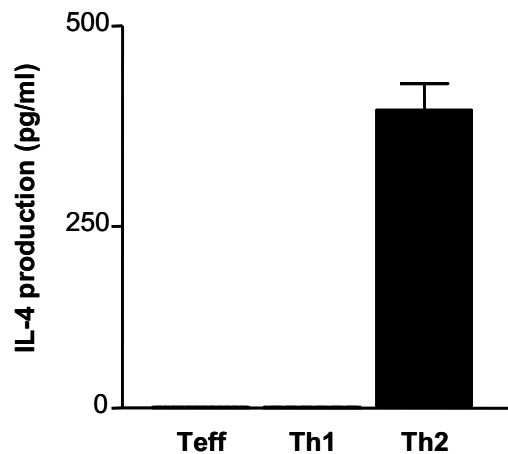

C

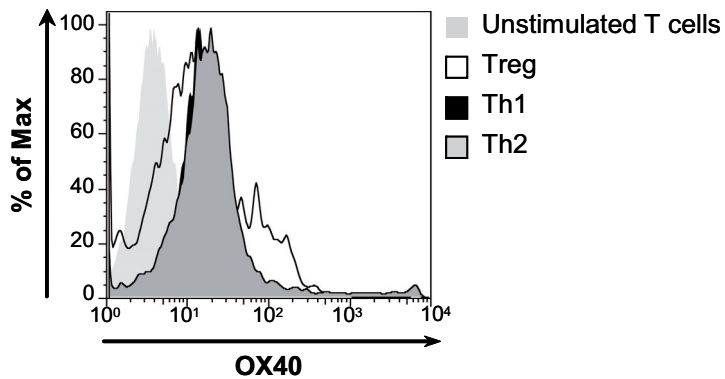

**Figure S1. Th1 and Th2 cell culture characterization.** (A-B) Supernatants from anti-CD3 plus anti-CD28 activated T cells (Teff), Th1 and Th2 cell cultures were harvested 72 hours upon stimulation and tested for IFN- $\gamma$  and IL-4 secretion by ELISA. (C) Unstimulated T cells, Tregs, Th1 and Th2 cells were tested for OX40 expression by flow cytometry.

**Figure S2**

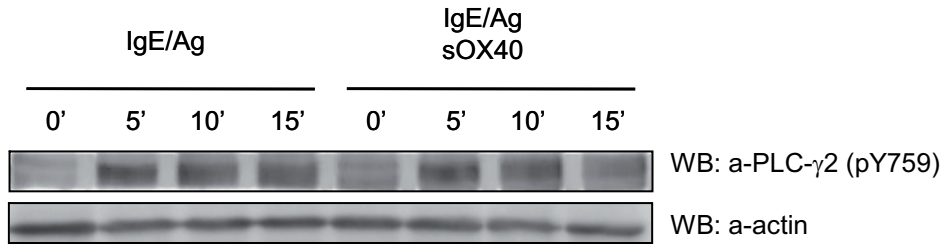

**Figure S2. sOX40-treatment does not affect PLC- $\gamma$ 2 activation in OX40L-deficient BMMCs.** Time course analysis of phospho-PLC- $\gamma$ 2 expression levels (pY759) in IgE/Ag-activated BMMCs in the absence or presence of sOX40 compared to total Actin expression levels.

Figure S3

A

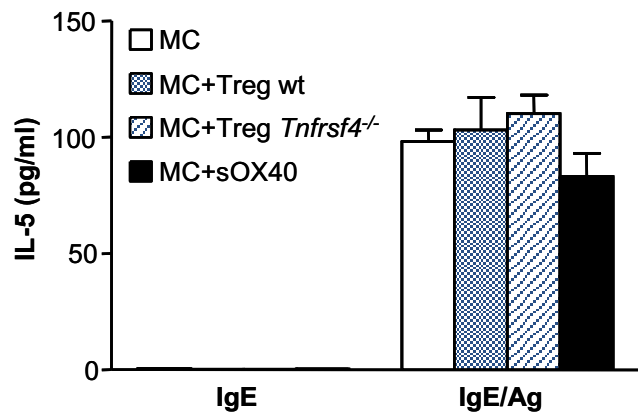

B

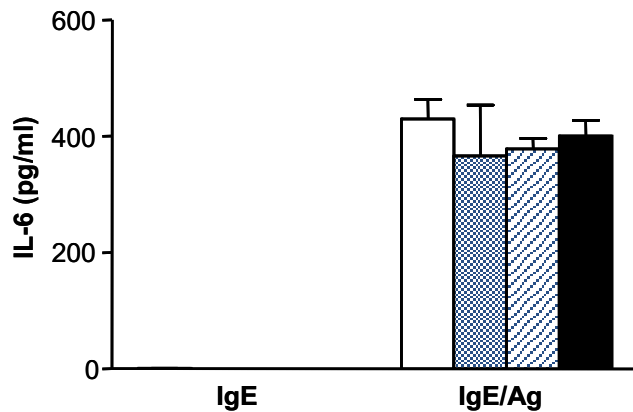

C

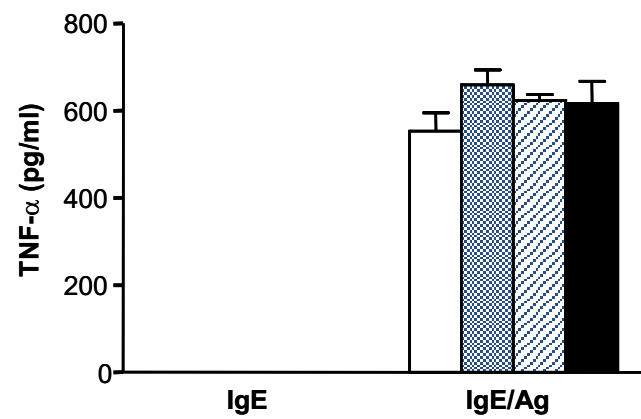

D

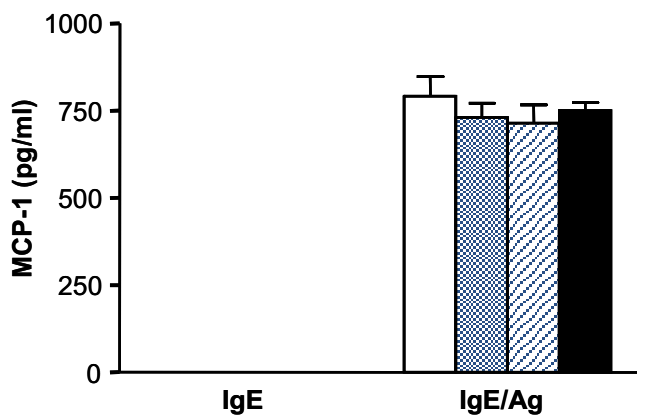

**Figure S3. Cytokine and chemokine production is not impaired in sOX40-treated BMMCs.** IL-5, IL-6, TNF- $\alpha$  and MCP-1 levels were evaluated by ELISA in the supernatants of IgE/Ag-stimulated BMMCs treated or not with sOX40, IgE/Ag-stimulated BMMCs co-cultured with equal numbers of wild type (wt) Tregs or OX40-deficient (*Tnfrsf4*<sup>-/-</sup>) Tregs. All graphs show means  $\pm$  S.E.M. of triple measurement of one representative experiment.
